# Supplementary material
Source: PubMed Central journal article supplement (PMC5571317)
Supplement: AAC.00995-17_zac009176503s1.pdf [file AAC.00995-17_zac009176503s1.pdf]

Supporting Information for:

Characterization of a large antibiotic resistance plasmid found in enteropathogenic *Escherichia coli* strain B171 and its relatedness to plasmids of diverse *E. coli*

Tracy H. Hazen<sup>1,2</sup>, Jane Michalski<sup>1</sup>, Sushma Nagaraj<sup>1</sup>, Iruka N. Okeke<sup>3</sup>, and David A. Rasko<sup>1,2\*</sup>

<sup>1</sup>Institute for Genome Sciences, <sup>2</sup>Department of Microbiology and Immunology, University of Maryland School of Medicine, Baltimore, MD, 21201; <sup>3</sup> Department of Biology, Haverford College, Haverford, PA, USA and Faculty of Pharmacy, University of Ibadan, Ibadan, Nigeria

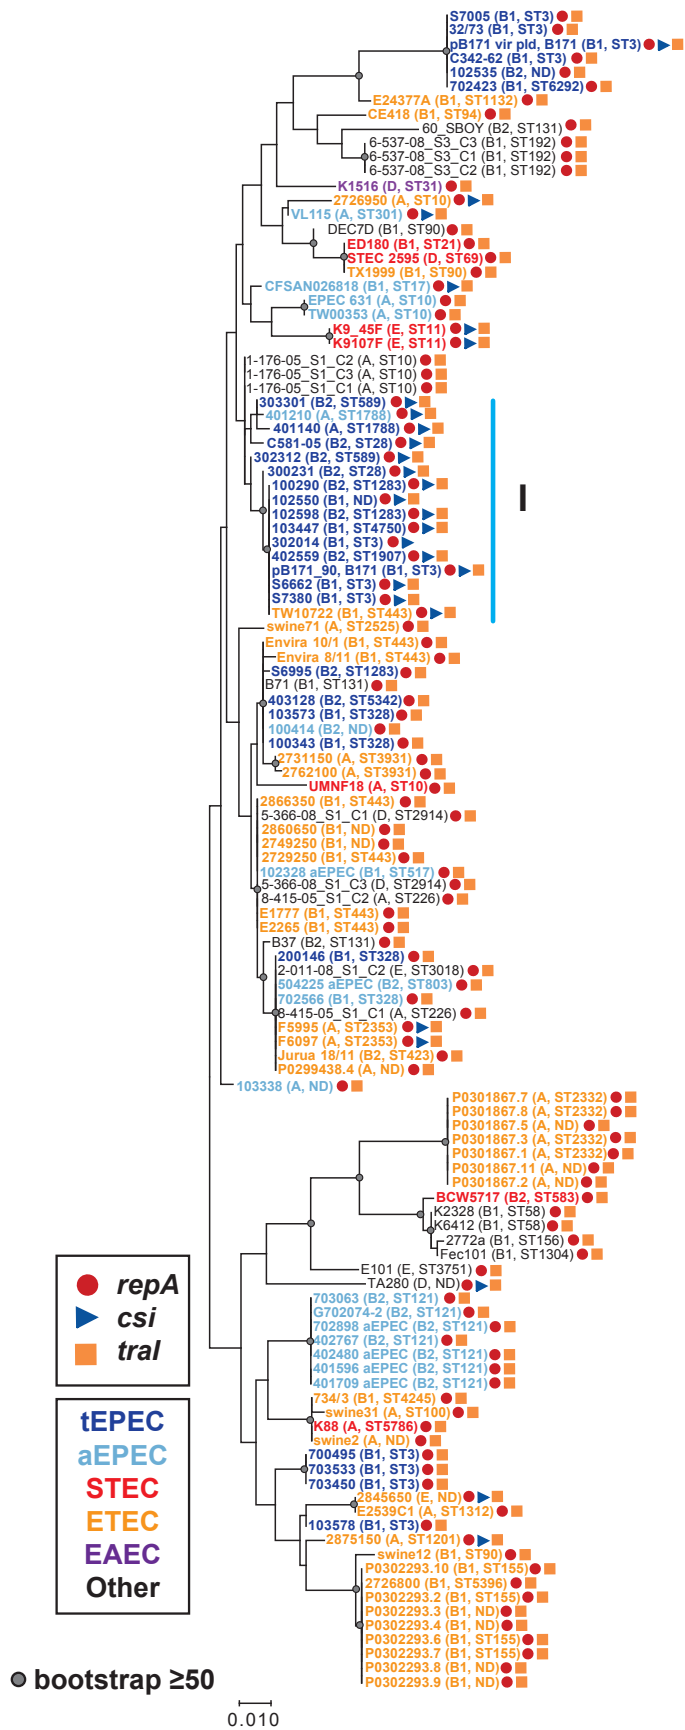

**Figure S1. Phylogenetic analysis of *repA*.** The *repA* nucleotide sequences from the resistance plasmid of EPEC strain B171 (pB171\_90), also from the B171 virulence plasmid (pB171, GenBank: NC\_002142.1)(1), and from the other *csi* and/or *traI*-containing *E. coli* genomes (see Table S1) were aligned using ClustalW of MEGA7 (2). The alignment was used to construct a maximum-likelihood phylogeny with the Kimura 2-parameter model and 1,000 bootstraps also using MEGA7 (2). The scale bar represents the approximate distance of 0.01 nucleotide substitutions per site. Bootstrap values  $\geq 50$  are indicated by a gray circle. The predicted *E. coli* pathotypes are indicated by the color of their genome label (see legend), and the phylogroup and MLST sequence type (ST) of each genome is denoted in parentheses. A blue vertical line indicates the formation of a clade with the same composition as clade I in the *csi* and *traI* phylogenies, while no similar group of genomes corresponding to clade II was identified.

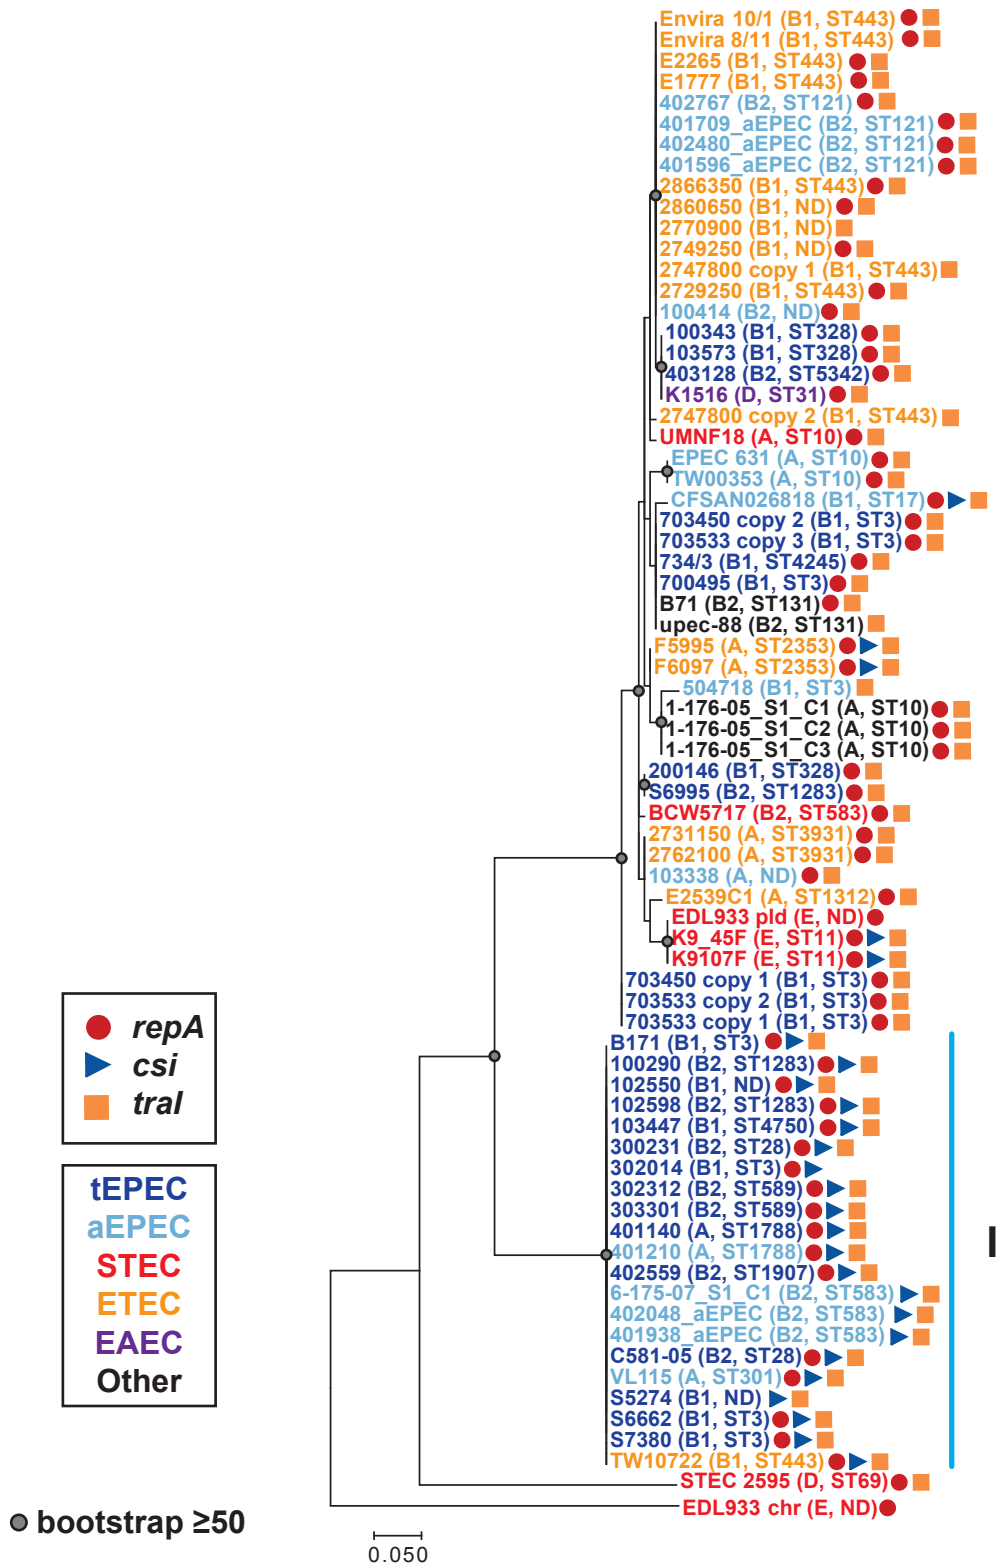

**Figure S2. Phylogenetic analysis of *hha*.** The *hha* nucleotide sequences from the resistance plasmid of EPEC strain B171 (pB171\_90), the *csi* and/or *tral*-containing *E. coli* genomes (Table S1), and the *hha* genes located on the chromosome and plasmid of *E. coli* O157:H7 strain EDL933 were aligned using ClustalW of MEGA7 (2). The alignment was used to construct a maximum-likelihood phylogeny with the Kimura 2-parameter model and 1,000 bootstraps also using MEGA7 (2). The scale bar represents the approximate distance of 0.01 nucleotide substitutions per site. Bootstrap values  $\geq 50$  are indicated by a gray circle. The predicted *E. coli* pathotypes are indicated by the color of their genome label (see legend), and the phylogroup and MLST sequence type (ST) of each genome is denoted in parentheses. A blue vertical line indicates the formation of a clade with the same composition as clade I in the *csi* and *tral* phylogenies, while no similar group of genomes corresponding to clade II was identified.

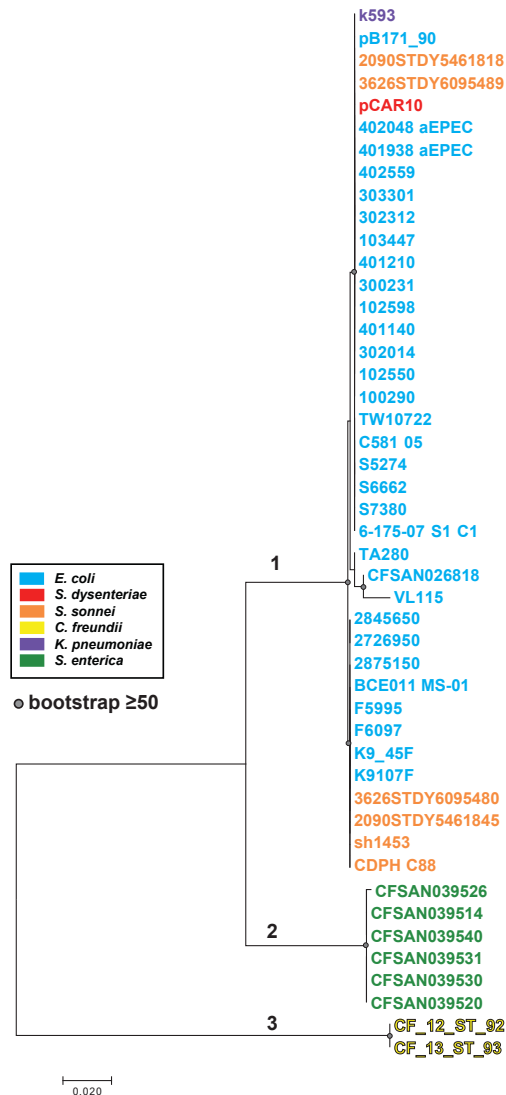

**Figure S3. Phylogenetic analysis of *csf*.** The *csf* nucleotide sequences of pB171\_90, *E. coli*, and other human enteric pathogens were aligned using ClustalW. The alignment was used to construct a maximum-likelihood phylogeny with the Kimura 2-parameter model and 1,000 bootstraps using MEGA7 (2). The scale bar represents the approximate distance of 0.02 nucleotide substitutions per site. Bootstrap values  $\geq 50$  are indicated by a shaded circle. The *E. coli* genomes are indicated in black, while the other enterics are indicated by the color of their genome label (see legend). The numbers 1-3 designate three distinct clades of *csf* sequences.

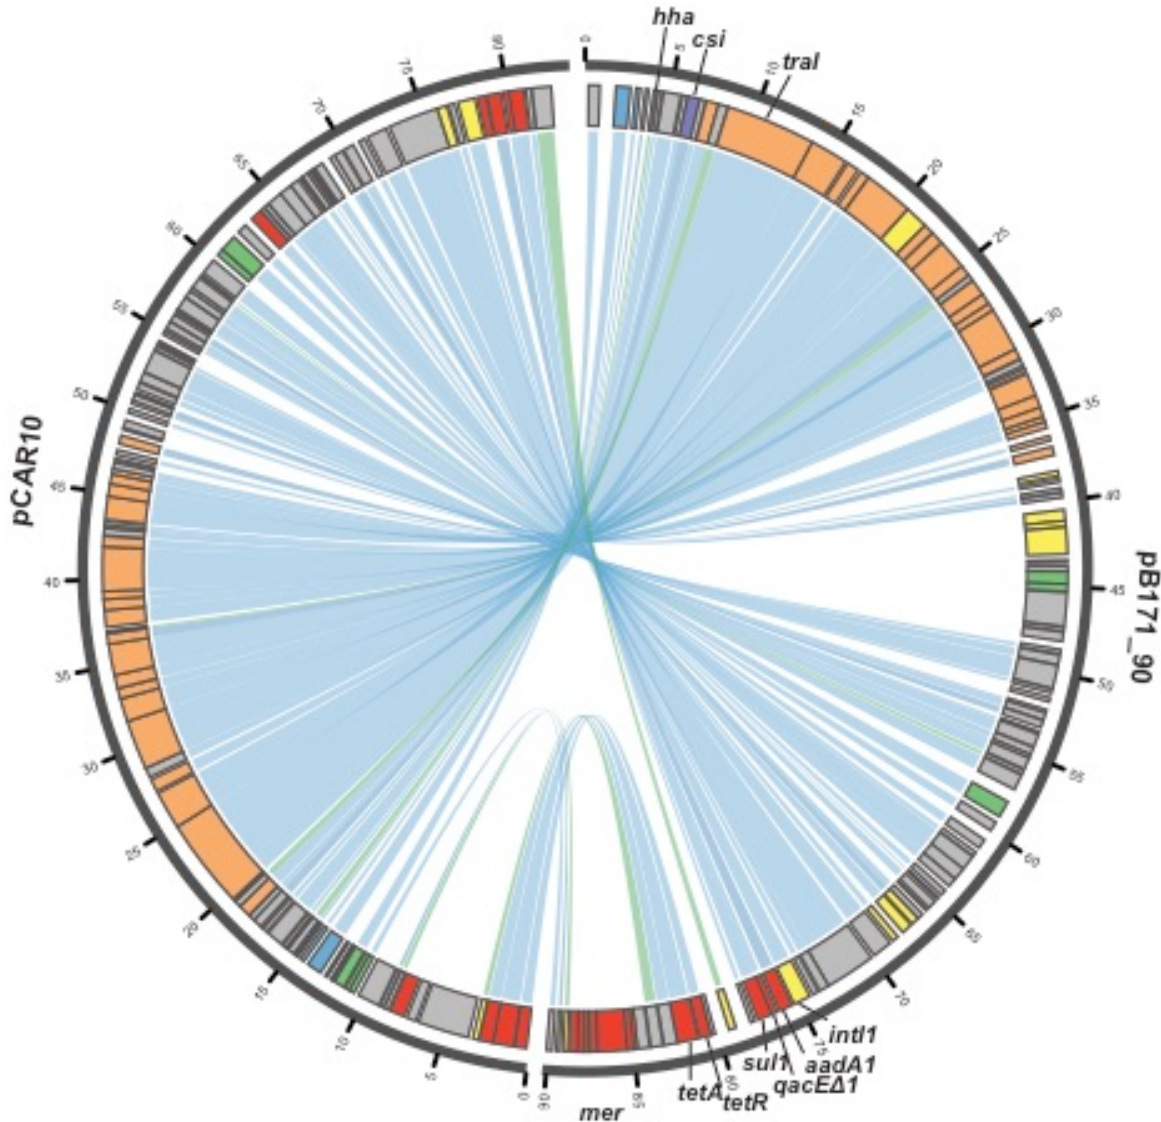

**Figure S4. Comparison of plasmids pB171\_90 and pCAR10.** Similarity among the protein-coding genes of pB171\_90 and the *S. dysenteriae* plasmid pCAR10 (GenBank: KT754161.1) is indicated by links representing BSR values obtained by comparing pB171\_90 genes to pCAR10 genes using BLASTN (3). Blue links indicate genes (79 genes) with significant similarity (BSR  $\geq 0.7$ ) and green links indicate genes (seven genes) with divergent similarity (BSR  $< 0.7$  and  $\geq 0.4$ ). pB171\_90 genes with no links (22 genes) were absent (BSR  $< 0.4$ ) from pCAR10. The outer track of the plot contains the

predicted protein-coding genes of each plasmid with their protein functions indicated by colors as follows: replication (blue), virulence (purple), antibiotic resistance (red), conjugative transfer (orange), plasmid stability (green), transposition (yellow), and unknown (grey).



## REFERENCES

1. **Tobe T, Hayashi T, Han CG, Schoolnik GK, Ohtsubo E, Sasakawa C.** 1999. Complete DNA sequence and structural analysis of the enteropathogenic *Escherichia coli* adherence factor plasmid. *Infect Immun* **67**:5455-5462.
2. **Kumar S, Stecher G, Tamura K.** 2016. MEGA7: Molecular Evolutionary Genetics Analysis Version 7.0 for Bigger Datasets. *Mol Biol Evol* **33**:1870-1874.
3. **Sahl JW, Caporaso JG, Rasko DA, Keim P.** 2014. The large-scale blast score ratio (LS-BSR) pipeline: a method to rapidly compare genetic content between bacterial genomes. *PeerJ* **2**:e332.

**Table S1.** Genomes analyzed in this study

| Strain ID      | Pathovar <sup>a</sup> | Molecular Serotype <sup>b</sup> | MLST ST <sup>c</sup> | Phylogroup | EPEC Lineage | Pathovar-Specific Features <sup>d</sup> | Select Genes of pB171_90 <sup>e</sup> |            |            |             |            |             |            | Accession No.  |
|----------------|-----------------------|---------------------------------|----------------------|------------|--------------|-----------------------------------------|---------------------------------------|------------|------------|-------------|------------|-------------|------------|----------------|
|                |                       |                                 |                      |            |              |                                         | <i>repA</i>                           | <i>hha</i> | <i>csi</i> | <i>tral</i> | <i>tet</i> | <i>sul1</i> | <i>mer</i> |                |
| 100290         | TEPEC                 | O127:H6                         | 1283                 | B2         | EPEC1        | LEE, BFP                                | +                                     | +          | +          | +           | -          | +           | 0          | JHQV00000000.1 |
| 100343         | TEPEC                 | ONT:H7                          | 328 (278)            | B1         | EPEC7        | LEE, BFP                                | +                                     | +          | -          | +           | -          | +           | 0          | JHQW00000000.1 |
| 102535         | TEPEC                 | O76:H51                         | ND                   | B2         | EPEC8        | LEE, BFP                                | +                                     | -          | -          | +           | -          | -           | 0          | JHST00000000.1 |
| 102550         | TEPEC                 | ND                              | ND                   | B1         | None         | LEE, BFP                                | +                                     | +          | +          | +           | +          | +           | 7          | JHQY00000000.1 |
| 102598         | TEPEC                 | O127:H6                         | 1283                 | B2         | EPEC1        | LEE, BFP                                | +                                     | +          | +          | +           | -          | +           | 0          | JHRW00000000.1 |
| 103447         | TEPEC                 | ONT:H2                          | 4750                 | B1         | None         | LEE, BFP                                | +                                     | +          | +          | +           | +          | +           | 7          | JHSV00000000.1 |
| 103573         | TEPEC                 | ONT:H7                          | 328 (278)            | B1         | EPEC7        | LEE, BFP                                | +                                     | +          | -          | +           | -          | +           | 0          | JHRA00000000.1 |
| 103578         | TEPEC                 | O111:H2                         | 3 (20)               | B1         | EPEC2        | LEE, BFP                                | +                                     | -          | -          | +           | -          | +           | 7          | JHRY00000000.1 |
| 200146         | TEPEC                 | O88:H25                         | 328 (278)            | B1         | EPEC7        | LEE, BFP                                | +                                     | +          | -          | +           | +          | -           | 0          | JHRZ00000000.1 |
| 300231         | TEPEC                 | O119:H6                         | 28 (28)              | B2         | EPEC4        | LEE, BFP                                | +                                     | +          | +          | +           | -          | -           | 0          | JHSC00000000.1 |
| 302014         | TEPEC                 | O111:H2                         | 3 (20)               | B1         | EPEC2        | LEE, BFP                                | +                                     | +          | +          | -           | +          | +           | 0          | JHRE00000000.1 |
| 302312         | TEPEC                 | O51:H49                         | 589                  | B2         | None         | LEE, BFP                                | +                                     | +          | +          | +           | +          | +           | 0          | JHTA00000000.1 |
| 303301         | TEPEC                 | O51:H49                         | 589                  | B2         | None         | LEE, BFP                                | +                                     | +          | +          | +           | +          | +           | 0          | JHTC00000000.1 |
| 401140         | TEPEC                 | ONT:H27                         | 1788                 | A          | EPEC5        | LEE, BFP                                | +                                     | +          | +          | +           | +          | +           | 7          | JHRM00000000.1 |
| 402559         | TEPEC                 | ONT:H34                         | 1907                 | B2         | None         | LEE, BFP                                | +                                     | +          | +          | +           | +          | +           | 0          | JHTH00000000.1 |
| 403128         | TEPEC                 | O76:H51                         | 5342                 | B2         | EPEC8        | LEE, BFP                                | +                                     | +          | -          | +           | -          | -           | 0          | CXZV00000000.1 |
| 700495         | TEPEC                 | O126:H2                         | 3 (20)               | B1         | EPEC2        | LEE, BFP                                | +                                     | +          | -          | +           | -          | +           | 0          | CYBA00000000.1 |
| 702423         | TEPEC                 | O126:H2                         | 6292                 | B1         | EPEC2        | LEE, BFP                                | +                                     | -          | -          | +           | -          | -           | 0          | JHSD00000000.1 |
| 703450         | TEPEC                 | O126:H2                         | 3 (20)               | B1         | EPEC2        | LEE, BFP                                | +                                     | +          | -          | +           | -          | +           | 0          | JHTM00000000.1 |
| 703533         | TEPEC                 | ONT:H2                          | 3 (20)               | B1         | EPEC2        | LEE, BFP                                | +                                     | +          | -          | +           | -          | +           | 0          | JHRS00000000.1 |
| 32/73          | TEPEC                 | O126:H2                         | 3 (20)               | B1         | EPEC2        | LEE, BFP                                | +                                     | -          | -          | +           | -          | -           | 0          | LAFA00000000.1 |
| B171           | TEPEC                 | O111:H2                         | 3 (20)               | B1         | EPEC2        | LEE, BFP                                | +                                     | +          | +          | +           | +          | +           | 7          | AAJX00000000.2 |
| C342-62        | TEPEC                 | O126:H2                         | 3 (20)               | B1         | EPEC2        | LEE, BFP                                | +                                     | -          | -          | +           | -          | -           | 0          | AKNI00000000.1 |
| C581-05        | TEPEC                 | O119:H6                         | 28 (28)              | B2         | EPEC4        | LEE, BFP                                | +                                     | +          | +          | +           | -          | +           | 0          | AIBE00000000.1 |
| S5274          | TEPEC                 | O111:H2                         | ND                   | B1         | EPEC2        | LEE, BFP                                | -                                     | +          | +          | +           | +          | +           | 0          | JICB00000000.1 |
| S6682          | TEPEC                 | ONT:H2                          | 3 (20)               | B1         | EPEC2        | LEE, BFP                                | +                                     | +          | +          | +           | +          | +           | 0          | JICC00000000.1 |
| S6995          | TEPEC                 | O127:H6                         | 1283                 | B2         | EPEC1        | LEE, BFP                                | +                                     | +          | -          | +           | -          | -           | 0          | JICH00000000.1 |
| S7005          | TEPEC                 | ONT:H2                          | 3 (20)               | B1         | EPEC2        | LEE, BFP                                | +                                     | -          | -          | +           | -          | +           | 0          | JICG00000000.1 |
| S7380          | TEPEC                 | O111:H2                         | 3 (20)               | B1         | EPEC2        | LEE, BFP                                | +                                     | +          | +          | +           | +          | +           | 0          | JICD00000000.1 |
| 100414         | aEPEC                 | O33:H6                          | ND                   | B2         | EPEC4        | LEE                                     | +                                     | +          | -          | +           | -          | -           | 0          | JHQX00000000.1 |
| 103338         | aEPEC                 | O118/O151:H5                    | ND                   | A          | EPEC5        | LEE                                     | +                                     | +          | -          | +           | -          | -           | 0          | JHSU00000000.1 |
| 401210         | aEPEC                 | ND                              | 1788                 | A          | EPEC5        | LEE                                     | +                                     | +          | +          | +           | +          | +           | 7          | JHSJ00000000.1 |
| 402767         | aEPEC                 | O33:HNT                         | 121 (28)             | B2         | EPEC4        | LEE                                     | +                                     | +          | -          | +           | +          | +           | 7          | CYET00000000.1 |
| 504718         | aEPEC                 | O128ac:H2                       | 3 (20)               | B1         | EPEC2        | LEE                                     | -                                     | +          | -          | +           | -          | -           | 0          | CYDK00000000.1 |
| 702566         | aEPEC                 | O88:H25                         | 328 (278)            | B1         | EPEC7        | LEE                                     | +                                     | -          | -          | +           | +          | -           | 0          | CYDT00000000.1 |
| 703063         | aEPEC                 | O33:HNT                         | 121 (28)             | B2         | EPEC4        | LEE                                     | +                                     | -          | -          | +           | -          | +           | 6          | CYEU00000000.1 |
| 102328_aEPEC   | aEPEC                 | O171:H19                        | 517                  | B1         | None         | LEE                                     | +                                     | -          | -          | +           | -          | -           | 0          | CYBD00000000.1 |
| 401596_aEPEC   | aEPEC                 | O33:HNT                         | 121 (28)             | B2         | EPEC4        | LEE                                     | +                                     | +          | -          | +           | +          | +           | 7          | CYBO00000000.1 |
| 401709_aEPEC   | aEPEC                 | O33:HNT                         | 121 (28)             | B2         | EPEC4        | LEE                                     | +                                     | +          | -          | +           | +          | +           | 7          | CYCR00000000.1 |
| 401938_aEPEC   | aEPEC                 | O63:H6                          | 583 (122)            | B2         | None         | LEE                                     | -                                     | +          | +          | +           | +          | +           | 7          | CYBT00000000.1 |
| 402048_aEPEC   | aEPEC                 | O63:H6                          | 583 (122)            | B2         | None         | LEE                                     | -                                     | +          | +          | +           | +          | +           | 7          | CXZI00000000.1 |
| 402480_aEPEC   | aEPEC                 | O33:HNT                         | 121 (28)             | B2         | EPEC4        | LEE                                     | +                                     | +          | -          | +           | +          | +           | 7          | CYBU00000000.1 |
| 504225_aEPEC   | aEPEC                 | O85:H31                         | 803                  | B2         | None         | LEE                                     | +                                     | -          | -          | +           | -          | -           | 0          | CXZC00000000.1 |
| 6-175-07_S1_C1 | aEPEC                 | O63:H6                          | 583 (122)            | B2         | None         | LEE                                     | -                                     | +          | +          | +           | -          | -           | 0          | JOQR00000000.1 |
| 702898_aEPEC   | aEPEC                 | O33:HNT                         | 121 (28)             | B2         | EPEC4        | LEE                                     | +                                     | -          | -          | +           | -          | +           | 6          | CYBW00000000.1 |
| CFSAN026818    | aEPEC                 | O103:H2                         | 17 (20)              | B1         | EPEC2        | LEE                                     | +                                     | +          | +          | +           | -          | -           | 0          | LDCR00000000.1 |
| EPEC 631       | aEPEC                 | O157:H16                        | 10 (10)              | A          | EPEC10       | LEE                                     | +                                     | +          | -          | +           | -          | -           | 0          | LZDW00000000.1 |
| G702074-2      | aEPEC                 | O33:HNT                         | 121 (28)             | B2         | EPEC4        | LEE                                     | +                                     | -          | -          | +           | -          | +           | 6          | CYGA00000000.1 |
| TW00353        | aEPEC                 | O157:H16                        | 10 (10)              | A          | EPEC10       | LEE                                     | +                                     | +          | -          | +           | -          | -           | 0          | AMUM00000000.1 |
| VL115          | aEPEC                 | O76:H2                          | 301 (165)            | A          | None         | LEE                                     | +                                     | +          | +          | +           | -          | -           | 0          | MIWW00000000.1 |
| K1516          | EAEC                  | O15:H18                         | 31 (31)              | D          | NA           | <i>aggR, aatA, pic</i>                  | +                                     | +          | -          | +           | +          | +           | 7          | JHJE00000000.1 |
| 2726800        | ETEC                  | O98:H32                         | 5396                 | B1         | NA           | LT, ST                                  | +                                     | -          | -          | +           | -          | -           | 0          | AQFE00000000.1 |
| 2726950        | ETEC                  | O128ac:H12                      | 10 (10)              | A          | NA           | ST                                      | +                                     | -          | +          | +           | -          | -           | 0          | AQED00000000.1 |
| 2729250        | ETEC                  | O115:H5                         | 443 (205)            | B1         | NA           | LT, ST                                  | +                                     | +          | -          | +           | -          | -           | 0          | AQEC00000000.1 |
| 2731150        | ETEC                  | O25:H16                         | 3931                 | A          | NA           | LT                                      | +                                     | +          | -          | +           | -          | -           | 0          | AQEB00000000.1 |
| 2747800        | ETEC                  | O115:H5                         | 443 (205)            | B1         | NA           | LT, ST                                  | -                                     | +          | -          | +           | -          | -           | 0          | AQEA00000000.1 |
| 2749250        | ETEC                  | O115:H5                         | ND                   | B1         | NA           | LT, ST                                  | +                                     | +          | -          | +           | -          | -           | 0          | AQDZ00000000.1 |
| 2762100        | ETEC                  | O25:H16                         | 3931                 | A          | NA           | LT                                      | +                                     | +          | -          | +           | -          | -           | 0          | AQDX00000000.1 |
| 2770900        | ETEC                  | O115:H5                         | ND                   | B1         | NA           | LT, ST                                  | -                                     | +          | -          | +           | -          | -           | 0          | AQDW00000000.1 |
| 2845650        | ETEC                  | O169/O183:H41                   | ND                   | E          | NA           | ST                                      | +                                     | -          | -          | +           | -          | -           | 0          | AQDR00000000.1 |
| 2860650        | ETEC                  | O115:H5                         | ND                   | B1         | NA           | LT, ST                                  | +                                     | +          | -          | +           | -          | -           | 0          | APXG00000000.1 |
| 2866350        | ETEC                  | O115:H5                         | 443 (205)            | B1         | NA           | LT, ST                                  | +                                     | +          | -          | +           | -          | -           | 0          | APXJ00000000.1 |
| 2875150        | ETEC                  | O25:H42                         | 1201                 | A          | NA           | ST                                      | +                                     | -          | +          | +           | -          | -           | 0          | APXK00000000.1 |
| BCE011_MS-01   | ETEC                  | O128ac:H12                      | 10 (10)              | A          | NA           | ST                                      | -                                     | -          | +          | +           | -          | -           | 0          | APXM00000000.1 |
| CE418          | ETEC                  | O148:H28                        | 94 (448)             | B1         | NA           | ST                                      | +                                     | -          | -          | +           | -          | +           | 1          | ATEW00000000.1 |
| E1777          | ETEC                  | O115:H5                         | 443 (205)            | B1         | NA           | LT, ST                                  | +                                     | +          | -          | +           | -          | -           | 0          | JTHI00000000.1 |
| E2265          | ETEC                  | O115:H5                         | 443 (205)            | B1         | NA           | LT, ST                                  | +                                     | +          | -          | +           | -          | -           | 0          | JUBB00000000.1 |
| E24377A        | ETEC                  | ONT:H28                         | 1132                 | B1         | NA           | LT, ST                                  | +                                     | -          | -          | +           | -          | -           | 0          | NC_009801.1    |
| E2539C1        | ETEC                  | O25:H16                         | 1312                 | A          | NA           | LT                                      | +                                     | +          | -          | +           | -          | -           | 0          | JHJV00000000.1 |
| Envira 10/1    | ETEC                  | O167:H5                         | 443 (205)            | B1         | NA           | LT, ST                                  | +                                     | +          | -          | +           | +          | -           | 0          | AQFD00000000.1 |
| Envira 8/11    | ETEC                  | O167:H5                         | 443 (205)            | B1         | NA           | LT, ST                                  | +                                     | +          | -          | +           | +          | -           | 0          | AQFC00000000.1 |
| F5995          | ETEC                  | O6:H16                          | 2353                 | A          | NA           | LT, ST                                  | +                                     | +          | +          | +           | -          | -           | 0          | JPXL00000000.1 |
| F6097          | ETEC                  | O6:H16                          | 2353                 | A          | NA           | LT, ST                                  | +                                     | +          | +          | +           | -          | -           | 0          | JPXJ00000000.1 |
| F6700          | ETEC                  | O148:H28                        | 1988                 | B1         | NA           | LT, ST                                  | -                                     | -          | -          | +           | +          | -           | 0          | JYIA00000000.1 |
| Jurua 18/11    | ETEC                  | O8:H9                           | 423 (23)             | B1         | NA           | LT                                      | +                                     | -          | -          | +           | -          | -           | 0          | AQFB00000000.1 |
| 734/3          | ETEC                  | ONT:H19                         | 4245                 | B1         | NA           | LT, ST                                  | +                                     | +          | -          | +           | -          | +           | 7          | JPQX00000000.1 |
| P0299438.10    | ETEC                  | ONT:H2                          | 100 (165)            | A          | NA           | LT, ST                                  | -                                     | -          | -          | +           | -          | -           | 0          | APYA00000000.1 |
| P0299438.4     | ETEC                  | ONT:H2                          | ND                   | A          | NA           | LT, ST                                  | +                                     | -          | -          | +           | -          | -           | 0          | APYD00000000.1 |
| P0301867.1     | ETEC                  | O71:H45                         | 2332                 | A          | NA           | ST                                      | +                                     | -          | -          | +           | -          | -           | 0          | AQEQ00000000.1 |
| P0301867.11    | ETEC                  | O71:H45                         | ND                   | A          | NA           | ST                                      | +                                     | -          | -          | +           | -          | -           | 0          | APYT00000000.1 |
| P0301867.13    | ETEC                  | O71:H45                         | 2332                 | A          | NA           | ST                                      | -                                     | -          | -          | +           | -          | -           | 0          | APZT00000000.1 |

|                |            |             |           |    |    |               |   |   |   |   |   |   |   |                 |
|----------------|------------|-------------|-----------|----|----|---------------|---|---|---|---|---|---|---|-----------------|
| P0301867.2     | ETEC       | O71:H45     | ND        | A  | NA | ST            | + | - | - | + | - | - | 0 | APZU00000000.1  |
| P0301867.3     | ETEC       | O71:H45     | 2332      | A  | NA | ST            | + | - | - | + | - | - | 0 | APYU00000000.1  |
| P0301867.4     | ETEC       | O71:H45     | 2332      | A  | NA | ST            | - | - | - | + | - | - | 0 | APYV00000000.1  |
| P0301867.5     | ETEC       | O71:H45     | ND        | A  | NA | ST            | + | - | - | + | - | - | 0 | APYW00000000.1  |
| P0301867.7     | ETEC       | O71:H45     | 2332      | A  | NA | ST            | + | - | - | + | - | - | 0 | APYX00000000.1  |
| P0301867.8     | ETEC       | ONT:H45     | 2332      | A  | NA | ST            | + | - | - | + | - | - | 0 | APYY00000000.1  |
| P0302293.10    | ETEC       | ONT:H18     | 155 (155) | B1 | NA | ST            | + | - | - | + | - | - | 0 | AQAA00000000.1  |
| P0302293.2     | ETEC       | ONT:H18     | 155 (155) | B1 | NA | LT, ST        | + | - | - | + | - | - | 0 | AQEP00000000.1  |
| P0302293.3     | ETEC       | ONT:H18     | ND        | B1 | NA | LT, ST        | + | - | - | + | - | - | 0 | AQAB00000000.1  |
| P0302293.4     | ETEC       | ONT:H18     | ND        | B1 | NA | LT, ST        | + | - | - | + | - | - | 0 | AQAC00000000.1  |
| P0302293.6     | ETEC       | ONT:H18     | 155 (155) | B1 | NA | LT, ST        | + | - | - | + | - | - | 0 | AQAD00000000.1  |
| P0302293.7     | ETEC       | ONT:H18     | 155 (155) | B1 | NA | LT, ST        | + | - | - | + | - | - | 0 | APZW00000000.1  |
| P0302293.8     | ETEC       | ONT:H18     | ND        | B1 | NA | LT, ST        | + | - | - | + | - | - | 0 | AQAE00000000.1  |
| P0302293.9     | ETEC       | ONT:H18     | ND        | B1 | NA | LT, ST        | + | - | - | + | - | - | 0 | AQAF00000000.1  |
| swine12        | ETEC       | O7:H19      | 90 (23)   | B1 | NA | LT            | + | - | - | + | + | - | 0 | LVMO00000000.1  |
| swine2         | ETEC       | O149:H10    | ND        | A  | NA | LT            | + | - | - | + | + | - | 0 | LVME00000000.1  |
| swine24        | ETEC       | O149:H10    | ND        | A  | NA | LT            | - | - | - | + | - | - | 0 | LVNA00000000.1  |
| swine31        | ETEC       | O149:H10    | 100 (165) | A  | NA | LT            | + | - | - | + | + | - | 7 | LVNH00000000.1  |
| swine71        | ETEC       | O3:H27      | 2525      | A  | NA | ST            | + | - | - | + | + | - | 7 | LVOU00000000.1  |
| TW10722        | ETEC       | O115:H5     | 443 (205) | B1 | NA | ST            | + | + | + | + | + | + | 3 | AELB00000000.1  |
| TX1999         | ETEC       | O8:H19      | 90 (23)   | B1 | NA | LT            | + | - | - | + | - | - | 5 | AFEB00000000.1  |
| BCW5717        | STEC       | O63:H6      | 583 (122) | B2 | NA | LEE, BFP, STX | + | + | - | + | - | - | 0 | FBVB00000000.1  |
| ED180          | STEC       | O26:H11     | 21 (29)   | B1 | NA | LEE, STX      | + | - | - | + | + | - | 0 | FAVO00000000.1  |
| K9_45F         | STEC       | O157:H7     | 11 (11)   | E  | NA | LEE, STX      | + | + | + | + | - | - | 0 | LHAP00000000.1  |
| K9107F         | STEC       | O157:H7     | 11 (11)   | E  | NA | LEE, STX      | + | + | + | + | - | - | 0 | LHAQ00000000.1  |
| K88            | STEC       | O141ab:H4   | 5786      | A  | NA | STX, LT       | + | - | - | + | - | - | 0 | LBBN00000000.1  |
| STEC 2595      | STEC       | O17/O77:H18 | 69 (69)   | D  | NA | STX           | + | + | - | + | - | - | 0 | LOIJO00000000.1 |
| UMNF18         | STEC       | O147:H4     | 10 (10)   | A  | NA | ST, STX       | + | + | - | + | - | - | 7 | AGTD00000000.1  |
| upec-39        | ExPEC/UPEC | O2:H1       | 73 (73)   | B2 | NA | papG          | - | - | - | + | - | - | 0 | JSHV00000000.1  |
| 60_SBOY        | none       | O16:H5      | 131       | B2 | NA | none          | + | - | - | + | + | + | 0 | JVAO00000000.1  |
| B37            | none       | O16:H5      | 131       | B2 | NA | none          | + | - | - | + | - | - | 7 | LRWD00000000.1  |
| B71            | none       | O25:H4      | 131       | B2 | NA | none          | + | + | - | + | - | - | 0 | LRWM00000000.1  |
| upec-88        | none       | O16:H5      | 131       | B2 | NA | none          | - | + | - | + | - | - | 0 | JSGB00000000.1  |
| 5-366-08_S1_C3 | none       | O166:H15    | 2914      | D  | NA | none          | + | - | - | + | - | + | 0 | JONE00000000.1  |
| 1-176-05_S1_C1 | none       | ONT:H10     | 10 (10)   | A  | NA | none          | + | + | - | + | + | + | 7 | JHDH00000000.1  |
| 1-176-05_S1_C2 | none       | ONT:H10     | 10 (10)   | A  | NA | none          | + | + | - | + | + | + | 7 | JJMA00000000.1  |
| 1-176-05_S1_C3 | none       | ONT:H10     | 10 (10)   | A  | NA | none          | + | + | - | + | + | + | 7 | JJLY00000000.1  |
| 2-011-08_S1_C2 | none       | ONT:H41     | 3018      | E  | NA | none          | + | - | - | + | - | - | 0 | JJMB00000000.1  |
| 2772a          | none       | ND          | 156 (156) | B1 | NA | none          | + | - | - | + | - | - | 0 | LCVG00000000.1  |
| 5-366-08_S1_C1 | none       | O166:H15    | 2914      | D  | NA | none          | + | - | - | + | - | + | 0 | JOQU00000000.1  |
| 6-537-08_S3_C1 | none       | O174:H7     | 192       | B1 | NA | none          | + | - | - | + | - | - | 0 | JORP00000000.1  |
| 6-537-08_S3_C2 | none       | O174:H7     | 192       | B1 | NA | none          | + | - | - | + | - | - | 0 | JORX00000000.1  |
| 6-537-08_S3_C3 | none       | O174:H7     | 192       | B1 | NA | none          | + | - | - | + | - | - | 0 | JORQ00000000.1  |
| 8-415-05_S1_C1 | none       | O40:H4      | 226 (226) | A  | NA | none          | + | - | - | + | + | - | 7 | JORZ00000000.1  |
| 8-415-05_S1_C2 | none       | O40:H4      | 226 (226) | A  | NA | none          | + | - | - | + | + | - | 7 | JOSQ00000000.1  |
| CVM N36834PS   | none       | O100:H19    | 1611      | B1 | NA | none          | - | - | - | + | - | - | 0 | JUCF00000000.1  |
| DEC7D          | none       | ONT:H43     | 90 (23)   | B1 | NA | none          | + | - | - | + | - | - | 0 | AIGD00000000.1  |
| E101           | none       | O187:H9     | 3751      | E  | NA | none          | + | - | - | + | - | - | 0 | AEXG00000000.1  |
| Fec101         | none       | O182:H16    | 1304      | B1 | NA | none          | + | - | - | + | - | - | 0 | MDYZ00000000.1  |
| K2328          | none       | O88:H25     | 58 (155)  | B1 | NA | none          | + | - | - | + | + | - | 7 | M1WN00000000.1  |
| K6412          | none       | O88:H25     | 58 (155)  | B1 | NA | none          | + | - | - | + | + | - | 7 | M1WP00000000.1  |
| TA280          | none       | ONT:H34     | ND        | D  | NA | none          | + | - | + | + | - | - | 0 | ADBA00000000.1  |
| upec-130       | none       | O93:H8      | ND        | B1 | NA | none          | - | - | - | + | - | - | 0 | JSNV00000000.1  |

Reference Genomes in the Phylogenomic Analysis

| Strain ID    | Pathovar <sup>a</sup> | MLST ST <sup>b</sup> | Phylogroup | EPEC Lineage | Pathovar-Specific Features | repA                 | hha | csi | tral | tet | sul1 | mer | Accession No. |                |
|--------------|-----------------------|----------------------|------------|--------------|----------------------------|----------------------|-----|-----|------|-----|------|-----|---------------|----------------|
| 100329       | TEPEC                 | ONT:H33              | 34 (10)    | A            | EPEC10                     | LEE, BFP             | +   | +   | -    | -   | +    | +   | 7             | JHRT00000000.1 |
| 300214       | TEPEC                 | O55:H51              | 5342       | B2           | EPEC8                      | LEE, BFP             | +   | +   | -    | -   | +    | +   | 7             | JHSB00000000.1 |
| 302053       | TEPEC                 | O33:H34              | 2346       | B2           | EPEC9                      | LEE, BFP             | +   | +   | -    | -   | +    | +   | 0             | JHRG00000000.1 |
| 302150       | TEPEC                 | ONT:H6               | 28 (28)    | B2           | EPEC4                      | LEE, BFP             | +   | +   | -    | -   | -    | -   | 0             | JHSD00000000.1 |
| 303145       | TEPEC                 | O33:H34              | 2346       | B2           | EPEC9                      | LEE, BFP             | +   | -   | -    | -   | +    | +   | 2             | JHSG00000000.1 |
| 401091       | TEPEC                 | ONT:H7               | ND         | B1           | EPEC7                      | LEE, BFP             | +   | -   | -    | -   | +    | +   | 7             | JHSI00000000.1 |
| 401588       | TEPEC                 | O55:H51              | 5342       | B2           | EPEC8                      | LEE, BFP             | +   | +   | -    | -   | +    | +   | 7             | JHSK00000000.1 |
| 402290       | TEPEC                 | ONT:H7               | ND         | B1           | EPEC7                      | LEE, BFP             | +   | -   | -    | -   | +    | +   | 7             | JHRQ00000000.1 |
| 702324       | TEPEC                 | O142:H34             | 2346       | B2           | EPEC9                      | LEE, BFP             | +   | +   | -    | -   | +    | +   | 7             | JHRR00000000.1 |
| C260-92      | TEPEC                 | ONT:H40              | 10 (10)    | A            | EPEC10                     | LEE, BFP             | -   | -   | -    | -   | -    | -   | 0             | AIAO00000000.1 |
| E2348/69     | TEPEC                 | O127:HNT             | 15         | B2           | EPEC1                      | LEE, BFP             | +   | -   | -    | -   | -    | -   | 0             | NC_011601.1    |
| 2362-75      | TEPEC                 | O55:H6               | 19         | B2           | EPEC1                      | LEE, BFP             | +   | +   | -    | -   | -    | +   | 7             | ADUL00000000.1 |
| E110019      | aEPEC                 | ONT:H9               | 381 (590)  | B1           | None                       | LEE                  | +   | +   | -    | -   | -    | -   | 0             | AAJW00000000.2 |
| CB9615       | aEPEC                 | O55:H7               | 335 (11)   | E            | None                       | LEE                  | -   | -   | -    | -   | -    | -   | 0             | NC_013941.1    |
| HS           | commensal             | O9:H4                | 46 (46)    | A            | NA                         | none                 | -   | -   | -    | -   | -    | -   | 0             | NC_009800.1    |
| 042          | EAEC                  | O44:H18              | 414        | D            | NA                         | aggR, aatA, pic, pet | +   | -   | -    | -   | +    | +   | 7             | FN554766.1     |
| 55989        | EAEC                  | O104:H4              | 678        | B1           | NA                         | pic                  | -   | -   | -    | -   | -    | -   | 0             | NC_011748.1    |
| TY-2482      | STEC/EAEC             | O104:H4              | 678        | B1           | NA                         | pic, STX             | -   | -   | -    | -   | +    | +   | 7             | AFOG00000000.1 |
| EDL933       | STEC/EHEC             | O157:H7              | ND         | E            | NA                         | LEE, STX             | +   | +   | -    | -   | -    | -   | 0             | NC_002655.2    |
| Sakai        | STEC/EHEC             | O157:H7              | 11 (11)    | E            | NA                         | LEE, STX             | +   | +   | -    | -   | -    | -   | 0             | NC_002695.1    |
| 11368        | STEC/EHEC             | O26:H11              | 21 (29)    | B1           | NA                         | LEE, STX             | +   | -   | -    | -   | -    | -   | 0             | NC_013361.1    |
| 11128        | STEC/EHEC             | O111:H8              | 16 (29)    | B1           | NA                         | LEE, STX             | +   | +   | -    | -   | -    | -   | 7             | NC_013364.1    |
| 2846750      | ETEC                  | O6:H16               | 4 (10)     | A            | NA                         | LT, ST               | -   | +   | -    | -   | +    | +   | 7             | AQGG00000000.1 |
| 2851500      | ETEC                  | O114:H49             | 5305       | B1           | NA                         | LT                   | -   | +   | -    | -   | -    | -   | 0             | AQDN00000000.1 |
| 2854350      | ETEC                  | O98:H32              | 5396       | B1           | NA                         | LT, ST               | +   | -   | -    | -   | -    | -   | 0             | APZL00000000.1 |
| 2866450      | ETEC                  | O114:H49             | 5305       | B1           | NA                         | LT                   | +   | +   | -    | -   | -    | -   | 0             | AQDI00000000.1 |
| B7A          | ETEC                  | O148:H28             | 94 (448)   | B1           | NA                         | LT, ST               | +   | -   | -    | -   | +    | +   | 0             | AAJT00000000.2 |
| BCE002_MS-12 | ETEC                  | O153/O178:HNT        | 5587       | B1           | NA                         | LT                   | +   | -   | -    | -   | +    | -   | 0             | AQDA00000000.1 |
| BCE019_MS-13 | ETEC                  | O6:H16               | 2353       | A            | NA                         | LT, ST               | -   | +   | -    | -   | -    | -   | 0             | AQCZ00000000.1 |

|                             |                 |             |           |    |    |        |   |   |   |   |     |   |   |                |
|-----------------------------|-----------------|-------------|-----------|----|----|--------|---|---|---|---|-----|---|---|----------------|
| BCE034_MS-14                | ETEC            | O78:HNT     | 173       | B1 | NA | ST     | + | - | - | - | -   | - | 0 | AQCY00000000.1 |
| H10407                      | ETEC            | O78:H11     | 48 (10)   | A  | NA | LT, ST | + | + | - | - | -   | - | 0 | FN649414.1     |
| MP021566.1                  | ETEC            | O6:H16      | 2353      | A  | NA | LT, ST | + | + | - | - | -   | - | 0 | AQEU00000000.1 |
| ThroopD                     | ETEC            | O63:H9      | 5392      | B1 | NA | LT, ST | + | + | - | - | -   | - | 0 | AQEJ00000000.1 |
| TW10598                     | ETEC            | O6:H16      | 4 (10)    | A  | NA | LT, ST | + | + | - | - | -   | - | 0 | AELA00000000.2 |
| TW10828                     | ETEC            | O114:H49    | 173       | B1 | NA | LT     | - | + | - | - | -   | - | 0 | AELC00000000.1 |
| TW11681                     | ETEC            | ONT:H45     | 2332      | A  | NA | ST     | + | + | - | - | +   | - | 7 | AELD00000000.1 |
| TW14425                     | ETEC            | O78:H9      | 23 (23)   | B1 | NA | ST     | + | + | - | - | -   | - | 0 | AELE00000000.1 |
| UMNK88                      | ETEC            | O149:H10    | 100 (165) | A  | NA | LT     | + | - | - | - | +   | + | 6 | NC_017641.1    |
| SE11                        | fecal isolate   | O173:H28    | 156 (156) | B1 | NA | none   | - | + | - | - | +/- | - | 0 | NC_011415.1    |
| IAI1                        | fecal isolate   | O8:H19      | 1128      | B1 | NA | none   | - | - | - | - | -   | - | 0 | NC_011741.1    |
| BL21                        | lab adapted     | O7:H48      | 93 (168)  | A  | NA | none   | - | - | - | - | -   | - | 0 | NC_012947.1    |
| BW2952                      | lab adapted     | O16:H48     | 10 (10)   | A  | NA | none   | - | - | - | - | -   | - | 0 | NC_012759.1    |
| ATCC 8739                   | lab adapted     | O146:H20    | ND        | A  | NA | none   | - | - | - | - | -   | - | 0 | NC_010468.1    |
| SMS_3_5                     | other           | ONT:H34     | 354 (354) | F  | NA | none   | + | + | - | - | +   | - | 0 | CP000970.1     |
| 53638                       | EIEC            | O124:H30    | 6         | A  | NA | ospB   | + | + | - | - | -   | - | 0 | AAKB00000000.2 |
| S88                         | ExPEC           | O45:H7      | 95 (95)   | B2 | NA | papG   | + | - | - | - | -   | - | 0 | NC_011742.1    |
| 536                         | ExPEC/UPEC      | O6:H31      | 127       | B2 | NA | papG   | - | - | - | - | -   | - | 0 | NC_008253.1    |
| UTI89                       | ExPEC/UPEC      | O18:H7      | 95 (95)   | B2 | NA | papG   | + | + | - | - | -   | - | 0 | NC_007946.1    |
| CFT073                      | ExPEC/UPEC      | O6:H1       | 73 (73)   | B2 | NA | papG   | - | - | - | - | -   | - | 0 | AE014075.1     |
| IAI39                       | ExPEC/UPEC      | O7:H45      | 62        | F  | NA | papG   | - | - | - | - | -   | - | 0 | NC_011750.1    |
| UMN026                      | ExPEC/UPEC      | O17/O77:H18 | 597 (69)  | D  | NA | papG   | + | + | - | - | -   | + | 0 | NC_011751.1    |
| <i>S. flexneri</i> 2a 2457T | <i>Shigella</i> | ND          | 245 (245) | B1 | NA | NA     | - | - | - | - | -   | - | 0 | NC_004741.1    |
| <i>S. boydii</i> 3083-94    | <i>Shigella</i> | ND          | 1129      | B1 | NA | NA     | + | + | - | - | -   | - | 0 | NC_010658.1    |
| <i>S. sonnei</i> 046        | <i>Shigella</i> | ND          | 152 (152) | B1 | NA | NA     | + | + | - | - | +   | - | 0 | NC_007384.1    |
| <i>S. dysenteriae</i> 197   | <i>Shigella</i> | ND          | 146       | E  | NA | NA     | + | - | - | - | -   | - | 0 | NC_007606.1    |

<sup>a</sup>The pathovar/pathotype of each genome analyzed was determined by *in silico* detection of virulence genes, or based on previous strain descriptions where available.

<sup>b</sup>The molecular serotype was determined using SerotypeFinder v 1.1 (<https://cncb.cbi.dtu.dk/services/SerotypeFinder/>) (Linsen et al 2015)

<sup>c</sup>The multilocus sequence typing (MLST) sequence type (ST) of each genome was determined by *in silico* detection of the loci in each genome and comparison with the pubmlst.org database. The number in parentheses indicates the ST clonal complex.

<sup>d</sup>The pathotype-specific virulence genes identified by *in silico* analysis of the genome assemblies.

<sup>e</sup>Genes of pB171\_90 that had a BSR  $\geq 0.7$  were considered present (+) in each of the genomes, while genes with a BSR  $< 0.7$  were absent (-). The *tet* genes are denoted as present (+) when both *tetA* and *tetR* were detected, or partially present (+/-) when one of the genes was present and the other was absent, or absent (-) when both genes were missing from the genome. The number of genes in the mercuric resistance cassette (n=7) that were detected with a BSR  $\geq 0.7$  in each genome is indicated.

**Table S2.** Summary of sequence differences identified in the EPEC virulence plasmid sequences

| Nucleotide Sequence Differences         |                                 |                       |                        |                                           | Protein Sequence Differences                    |                                 |                       |                                             |                                         |                |
|-----------------------------------------|---------------------------------|-----------------------|------------------------|-------------------------------------------|-------------------------------------------------|---------------------------------|-----------------------|---------------------------------------------|-----------------------------------------|----------------|
| Location in pB171 Sequence <sup>a</sup> | pB171 (AB024946.1) <sup>b</sup> | pB171_69 <sup>c</sup> | pB171 ORF <sup>d</sup> | Base Change of pB171_69 compared to pB171 | Location in pB171 Protein Sequence <sup>a</sup> | pB171 (AB024946.1) <sup>b</sup> | pB171_69 <sup>c</sup> | Protein Accession No. of pB171 <sup>d</sup> | Predicted Protein Function <sup>d</sup> | Description    |
| 449                                     | G                               | C                     | ORF1                   | SNV                                       | 54                                              | V                               | L                     | BAA84836.1                                  | replication protein                     | Non-synonymous |
| 451                                     | C                               | G                     | ORF1                   | SNV                                       | 54                                              | V                               | L                     | "                                           | "                                       | Non-synonymous |
| 535                                     | C                               | G                     | ORF1                   | SNV                                       | 82                                              | N                               | K                     | "                                           | "                                       | Non-synonymous |
| 592                                     | G                               | T                     | ORF1                   | SNV                                       | 101                                             | V                               | V                     | "                                           | "                                       | Synonymous     |
| 2631                                    | T                               | -                     | none                   | Deletion                                  |                                                 |                                 |                       |                                             |                                         | Non-coding     |
| 14,652                                  | A                               | -                     | none                   | Deletion                                  |                                                 |                                 |                       |                                             |                                         | Non-coding     |
| 16,194                                  | T                               | -                     | none                   | Deletion                                  |                                                 |                                 |                       |                                             |                                         | Non-coding     |
| 17,487                                  | G                               | A                     | none                   | SNV                                       |                                                 |                                 |                       |                                             |                                         | Non-coding     |
| 20,870                                  | G                               | -                     | ORF24                  | Deletion                                  | 38                                              | G                               | frameshift            | BAA84859.1                                  | bundle-forming pilus protein, BfpT      | Frameshift     |
| 24,488                                  | -                               | C                     | none                   | Insertion                                 |                                                 |                                 |                       |                                             |                                         | Non-coding     |
| 25,615                                  | T                               | C                     | ORF30                  | SNV                                       | 34                                              | L                               | L                     | BAA84865.1                                  | transposase                             | Synonymous     |
| 25,658                                  | A                               | G                     | ORF30                  | SNV                                       | 48                                              | E                               | G                     | "                                           | "                                       | Non-synonymous |
| 26,296                                  | T                               | C                     | ORF31                  | SNV                                       | 138                                             | L                               | L                     | BAA84866.1                                  | transposase                             | Synonymous     |
| 26,870                                  | G                               | T                     | ORF31                  | SNV                                       | 330                                             | V                               | L                     | "                                           | "                                       | Non-synonymous |
| 27,080                                  | A                               | T                     | ORF31                  | SNV                                       | 400                                             | T                               | S                     | "                                           | "                                       | Non-synonymous |
| 27,122                                  | A                               | C                     | ORF31                  | SNV                                       | 414                                             | S                               | R                     | "                                           | "                                       | Non-synonymous |
| 27,138                                  | T                               | C                     | ORF31                  | SNV                                       | 419                                             | V                               | A                     | "                                           | "                                       | Non-synonymous |
| 27,158                                  | G                               | C                     | ORF31                  | SNV                                       | 426                                             | V                               | L                     | "                                           | "                                       | Non-synonymous |
| 27,172                                  | C                               | T                     | ORF31                  | SNV                                       | 430                                             | D                               | D                     | "                                           | "                                       | Synonymous     |
| 27,175                                  | G                               | C                     | ORF31                  | SNV                                       | 431                                             | G                               | G                     | "                                           | "                                       | Synonymous     |
| 65,084                                  | C                               | T                     | ORF76                  | SNV                                       | 77                                              | R                               | W                     | BAA84911.1                                  | putative DNA binding protein            | Non-synonymous |
| 66,376                                  | A                               | G                     | ORF77                  | SNV                                       | 296                                             | Q                               | Q                     | BAA84912.1                                  | helix-turn-helix family protein         | Synonymous     |
| 66,395                                  | G                               | C                     | ORF77                  | SNV                                       | 303                                             | A                               | P                     | "                                           | "                                       | Non-synonymous |
| 66,450                                  | G                               | A                     | ORF77                  | SNV                                       | 321                                             | G                               | D                     | "                                           | "                                       | Non-synonymous |
| 66,453                                  | G                               | A                     | ORF77                  | SNV                                       | 322                                             | S                               | K                     | "                                           | "                                       | Non-synonymous |
| 66,454                                  | C                               | A                     | ORF77                  | SNV                                       | 322                                             | S                               | K                     | "                                           | "                                       | Non-synonymous |
| 68,200                                  | -                               | T                     | ORF80                  | Insertion                                 | 6                                               | T                               | frameshift            | BAA84915.1                                  | hypothetical protein                    | Frameshift     |
| 68,287                                  | T                               | -                     | none                   | Deletion                                  |                                                 |                                 |                       |                                             |                                         | Non-coding     |

<sup>a</sup>This is the relative location of the sequence differences of pB171\_69 compared to the previously-sequenced virulence plasmid pB171 (AB024946.1).

<sup>b</sup>The previously-sequenced B171 virulence plasmid, pB171 (GenBank: AB024946.1).

<sup>c</sup>The newly-sequenced B171 virulence plasmid, pB171\_69 (Genbank: CP021211).

<sup>d</sup>The designated ORFs and annotation of the previously-sequenced plasmid pB171 described in Tobe *et al.* (1999).

<sup>e</sup>Identification of single nucleotide variant (SNV), insertion, or deletion in pB171\_69 compared to pB171.
